# Supplementary material for: Mechanism investigation of fermented egg-milk peptides on colonic inflammatory diseases: based on in vivo and in silico research
Source: Royal Society of Chemistry journal article supplement (doi:10.1039/d2fo02577a), 2022-01-01
Supplement: d2fo02577a1.pdf [file d2fo02577a1.pdf]

## 1 Supplementary Information

### 2 Mechanism investigation of fermented egg-milk peptides on colonic

### 3 inflammatory diseases: Based on *in vivo* and *in silico* research

4 Siwen Lyu, Qi Yang, Ting Li, Xuehui Duan, Jingbo Liu, Fengguang Pan\*, Yiding Yu

5 \* Ting Zhang

6

7

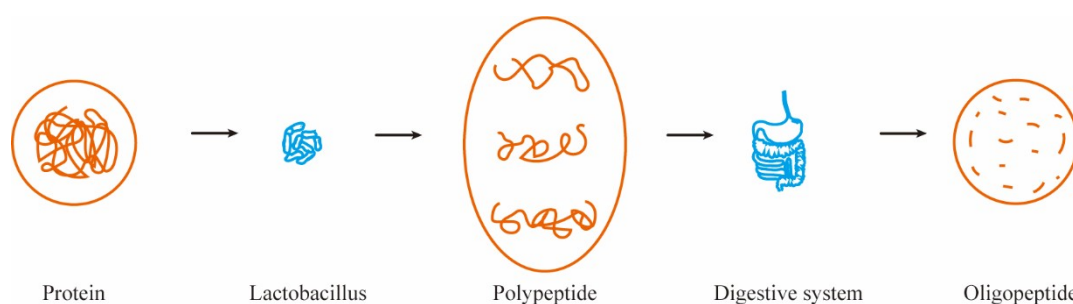

9 Fig.S1 The proteins in fermented egg-milk peptides (FEMP) could be hydrolyzed by

10 *Lactobacillus*, and the digested fermented egg-milk peptides (dFEMP) after digestion

11 in the gastrointestinal tract could be released.

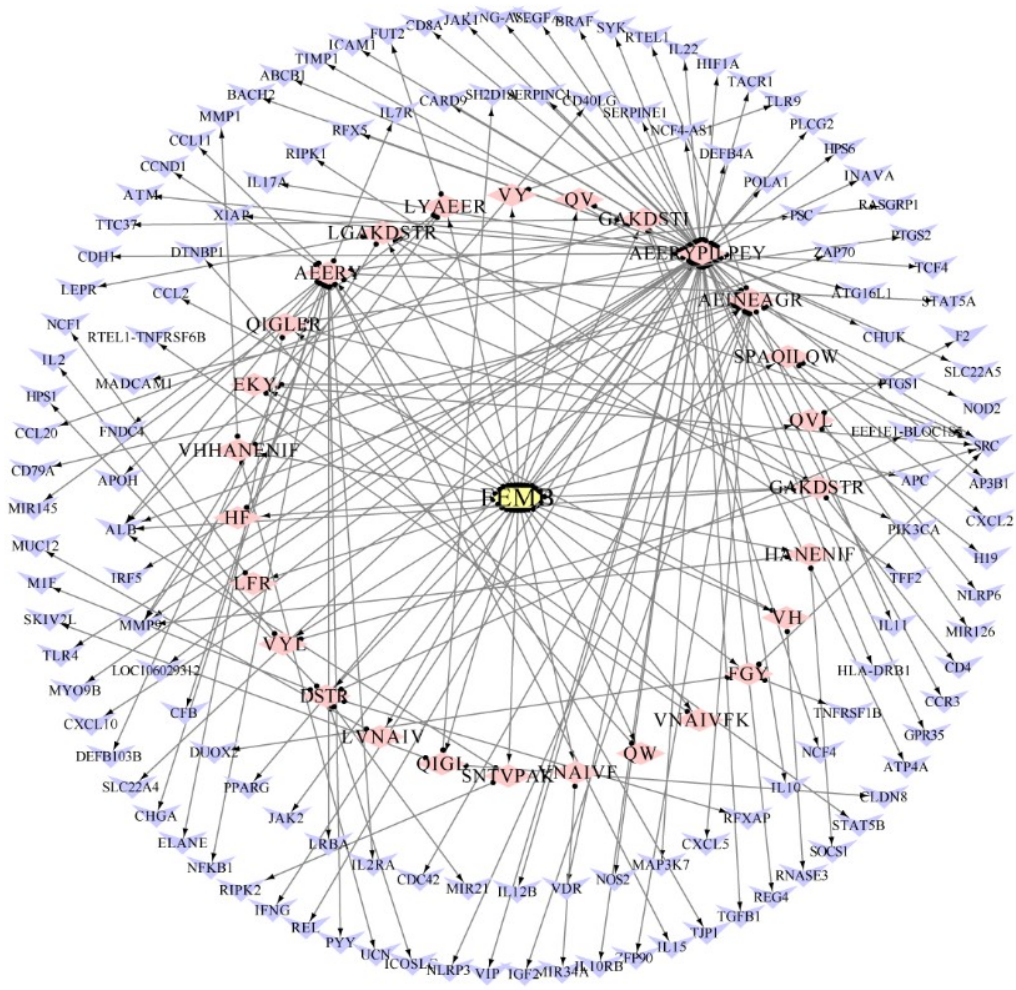

Fig.S2 Network diagram of digested fermented egg-milk peptides (dfFEMP)-targets interaction.

Tab.S1 The ingredient (proteins) in fermented egg-milk peptides (FEMP)

| Protein                                  | Mw (kDa) |
|------------------------------------------|----------|
| Alpha lactalbumin                        | 14.1     |
| Alpha S1 casein                          | 24.4     |
| Alpha-S2-casein                          | 26.0     |
| Beta-casein                              | 8.7      |
| Beta-lactoglobulin                       | 19.9     |
| Extracellular fatty acid binding protein | 3.7      |
| Guanine nucleotide-binding protein G     | 40.0     |
| Hep21 protein                            | 12.0     |
| Kappa-casein                             | 14.9     |
| Lactoferrin                              | 78.1     |
| Lysozyme                                 | 16.2     |
| Major allergen beta-lactoglobulin        | 20.0     |
| Ovalbumin (OVA)                          | 42.8     |
| Ovoinhibitor                             | 57.0     |
| Ovotransferrin                           | 77.7     |
| Riboflavin-binding protein               | 6.9      |
| Selenium-binding protein                 | 52.5     |
| Serum albumin                            | 69.2     |

Tab.S2 The ingredient (peptides) in fermented egg-milk peptides (FEMP)

| Sequence                           | PSMs | Master Protein Description | Origin     | m/z [Da] | XCorr |
|------------------------------------|------|----------------------------|------------|----------|-------|
| VHHANENIFYCPIAIMSALAMVYLGAK        | 62   | Ovalbumin                  | Gallus     | 1011.844 | 6.52  |
| CNFCNAVVESNGTLTSLSHFGK             | 11   | Ovomucoid                  | Gallus     | 785.701  | 6.42  |
| CNFCNAVVESNGTLTSLSHFGKC            | 4    | Ovomucoid                  | Gallus     | 839.043  | 6.31  |
| NAPYSGYSGAFHCLKDGGKGDVAFVK         | 18   | Ovotransferrin             | Gallus     | 672.827  | 6.25  |
| RVPSLMDSQLYLGFEYYSIAIQSMR          | 22   | Ovotransferrin             | Gallus     | 952.133  | 6.22  |
| KIVSDGNGMNAWVAVR                   | 8    | Lysozyme C                 | Gallus     | 902.450  | 6.03  |
| LKPIAAEVYEHTEGSTTSYYAVAVVKK        | 13   | Ovotransferrin             | Gallus     | 739.393  | 5.96  |
| GGLEPINFQTAADQAR                   | 175  | Ovalbumin                  | Gallus     | 844.422  | 5.81  |
| KDSNVNWNNLK                        | 6    | Ovotransferrin             | Gallus     | 666.338  | 5.75  |
| SPAQILQWQVLSNTVPAK                 | 2    | $\kappa$ -Casein           | Bos taurus | 990.549  | 5.62  |
| MGSIGAASMEFCFDVFK                  | 46   | Ovalbumin                  | Gallus     | 904.405  | 5.62  |
| ILDKVGINYWLAHK                     | 4    | Alpha-lactalbumin protein  | Bos taurus | 557.319  | 5.59  |
| VGINYWLAHK                         | 2    | Alpha-lactalbumin protein  | Bos taurus | 600.830  | 5.59  |
| YPSYGLNYYQQKPVALINNQFLPYPPYAKPAAVR | 1    | Kappa casein               | Bos taurus | 858.406  | 5.54  |
| LSFNPTQLEEQCHI                     | 9    | Beta-lactoglobulin         | Bos taurus | 809.423  | 5.51  |

Notes:  $m/z$ , the ratio of the protons number to the charges number. Generally, the range of a mass spectrum was judged by the mass-to-charge ratio.

Tab.S3 The targets prediction of peptides in **digested fermented egg-milk peptides**  
(dFEMP)

| Number | Target                                                | Genename | Uniprot ID |
|--------|-------------------------------------------------------|----------|------------|
| 1      | Acetyl-CoA acetyltransferase, mitochondrial           | ACAT1    | P24752     |
| 2      | Aldose reductase                                      | AKR1B1   | P15121     |
| 3      | Aldo-keto reductase family 1 member C2                | AKR1C2   | P52895     |
| 4      | Serum albumin                                         | ALB      | P02768     |
| 5      | Angiogenin                                            | ANG      | P03950     |
| 6      | Apoptotic protease-activating factor 1                | APAF1    | O14727     |
| 7      | Tyrosine-protein kinase BTK                           | BTK      | Q06187     |
| 8      | Complement C1s subcomponent                           | C1S      | P09871     |
| 9      | Caspase-1                                             | CASP1    | P29466     |
| 10     | Catalase                                              | CAT      | P04040     |
| 11     | C-C motif chemokine 24                                | CCL24    | O00175     |
| 12     | Cyclin-A2                                             | CCNA2    | P20248     |
| 13     | Cell division control protein 42 homolog              | CDC42    | P60953     |
| 14     | Chloride intracellular channel protein 1              | CLIC1    | O00299     |
| 15     | Chymase                                               | CMA1     | P23946     |
| 16     | Casein kinase II subunit alpha                        | CSNK2A1  | P68400     |
| 17     | Cathepsin G                                           | CTSG     | P08311     |
| 18     | Spliceosome RNA helicase DDX39B                       | DDX39B   | Q13838     |
| 19     | Dipeptidase 1                                         | DPEP1    | P16444     |
| 20     | Ephrin type-A receptor 2                              | EPHA2    | P29317     |
| 21     | Fatty acid-binding protein, epidermal                 | FABP5    | Q01469     |
| 22     | Glucose-6-phosphate 1-dehydrogenase                   | G6PD     | P11413     |
| 23     | Trifunctional purine biosynthetic protein adenosine-3 | GART     | P22102     |
| 24     | Growth factor receptor-bound protein 2                | GRB2     | P62993     |
| 25     | Glycogen synthase kinase-3 beta                       | GSK3B    | P49841     |
| 26     | Glutathione reductase, mitochondrial                  | GSR      | P00390     |
| 27     | Glutathione S-transferase A1                          | GSTA1    | P08263     |
| 28     | Glutathione S-transferase Mu 1                        | GSTM1    | P09488     |
| 29     | Glutathione S-transferase P                           | GSTP1    | P09211     |
| 30     | Hydroxyacyl-coenzyme A dehydrogenase, mitochondrial   | HADH     | Q16836     |
| 31     | Hepatocyte growth factor                              | HGF      | P14210     |
| 32     | 3-hydroxy-3-methylglutaryl-coenzyme A reductase       | HMGCR    | P04035     |
| 33     | GTPase HRas                                           | HRAS     | P01112     |
| 34     | Heat shock protein HSP 90-alpha                       | HSP90AA1 | P07900     |
| 35     | Insulin-like growth factor 1 receptor                 | IGF1R    | P08069     |
| 36     | Interleukin-2                                         | IL2      | P60568     |
| 37     | Inosine-5'-monophosphate dehydrogenase 2              | IMPDH2   | P12268     |
| 38     | Insulin receptor                                      | INSR     | P06213     |
| 39     | Inositol-trisphosphate 3-kinase A                     | ITPKA    | P23677     |
| 40     | Mast/stem cell growth factor receptor Kit             | KIT      | P10721     |

|    |                                                        |          |        |
|----|--------------------------------------------------------|----------|--------|
| 41 | Tyrosine-protein kinase Lck                            | LCK      | P06239 |
| 42 | Lysozyme C                                             | LYZ      | P61626 |
| 43 | Mitogen-activated protein kinase 12                    | MAPK12   | P53778 |
| 44 | MAP kinase-activated protein kinase 2                  | MAPKAPK2 | P49137 |
| 45 | Neprilysin                                             | MME      | P08473 |
| 46 | Interstitial collagenase                               | MMP1     | P03956 |
| 47 | Macrophage metalloelastase                             | MMP12    | P39900 |
| 48 | Stromelysin-1                                          | MMP3     | P08254 |
| 49 | Matrix metalloproteinase-9                             | MMP9     | P14780 |
| 50 | Nitric oxide synthase, endothelial                     | NOS3     | P29474 |
| 51 | cAMP-specific 3',5'-cyclic phosphodiesterase 4D        | PDE4D    | Q08499 |
| 52 | Phosphatidylinositol 3-kinase regulatory subunit alpha | PIK3R1   | P27986 |
| 53 | Phospholipase A2, membrane associated                  | PLA2G2A  | P14555 |
| 54 | Mismatch repair endonuclease PMS2                      | PMS2     | P54278 |
| 55 | Tyrosine-protein phosphatase non-receptor type 1       | PTPN1    | P18031 |
| 56 | Ras-related protein Rab-5A                             | RAB5A    | P20339 |
| 57 | Ras-related C3 botulinum toxin substrate 1             | RAC1     | P63000 |
| 58 | RAF proto-oncogene serine/threonine-protein kinase     | RAF1     | P04049 |
| 59 | Retinoic acid receptor beta                            | RARB     | P10826 |
| 60 | Retinoic acid receptor gamma                           | RARG     | P13631 |
| 61 | Eosinophil cationic protein                            | RNASE3   | P12724 |
| 62 | Retinoic acid receptor RXR-alpha                       | RXRA     | P19793 |
| 63 | Retinoic acid receptor RXR-beta                        | RXRB     | P28702 |
| 64 | E-selectin                                             | SELE     | P16581 |
| 65 | Proto-oncogene tyrosine-protein kinase Src             | SRC      | P12931 |
| 66 | Antigen peptide transporter 1                          | TAP1     | Q03518 |
| 67 | Transforming growth factor beta-2                      | TGFB2    | P61812 |
| 68 | Triosephosphate isomerase 1                            | TPI1     | P60174 |
| 69 | Triggering receptor expressed on myeloid cells 1       | TREM1    | Q9NP99 |

---
